# Supplementary material for: Causal effects of inflammation on long-term mortality: A mendelian randomization study
Source: publisher site journal article supplement (doi:10.18632/aging.206352), 2026-02-06
Supplement: Supplementary file 2 [file aging-v18i1-206352-supplementary-material-SD1.pdf]

SUPPLEMENTARY FIGURES

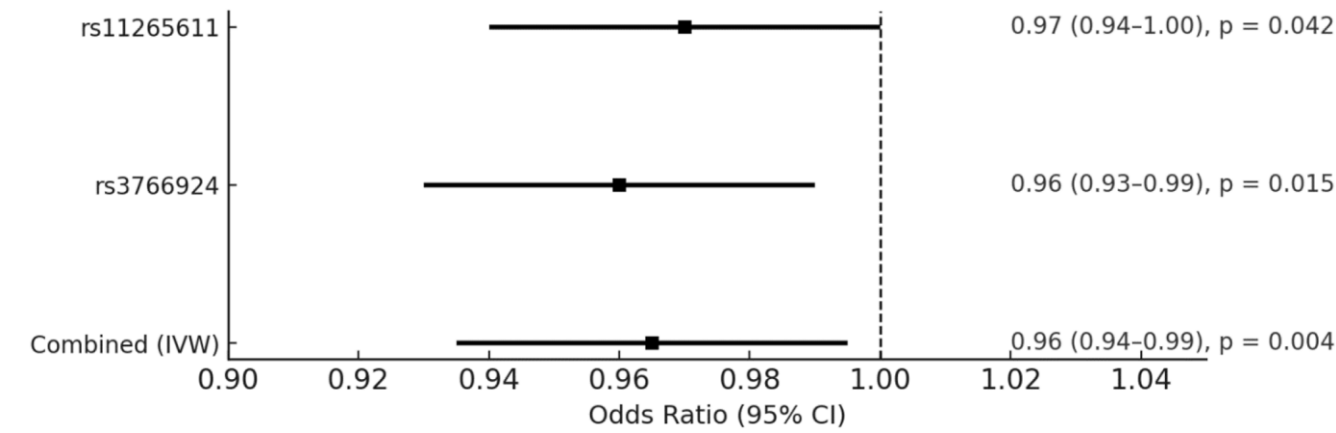

Supplementary Figure 1. Cis-mendelian randomization for IL6R and mortality.

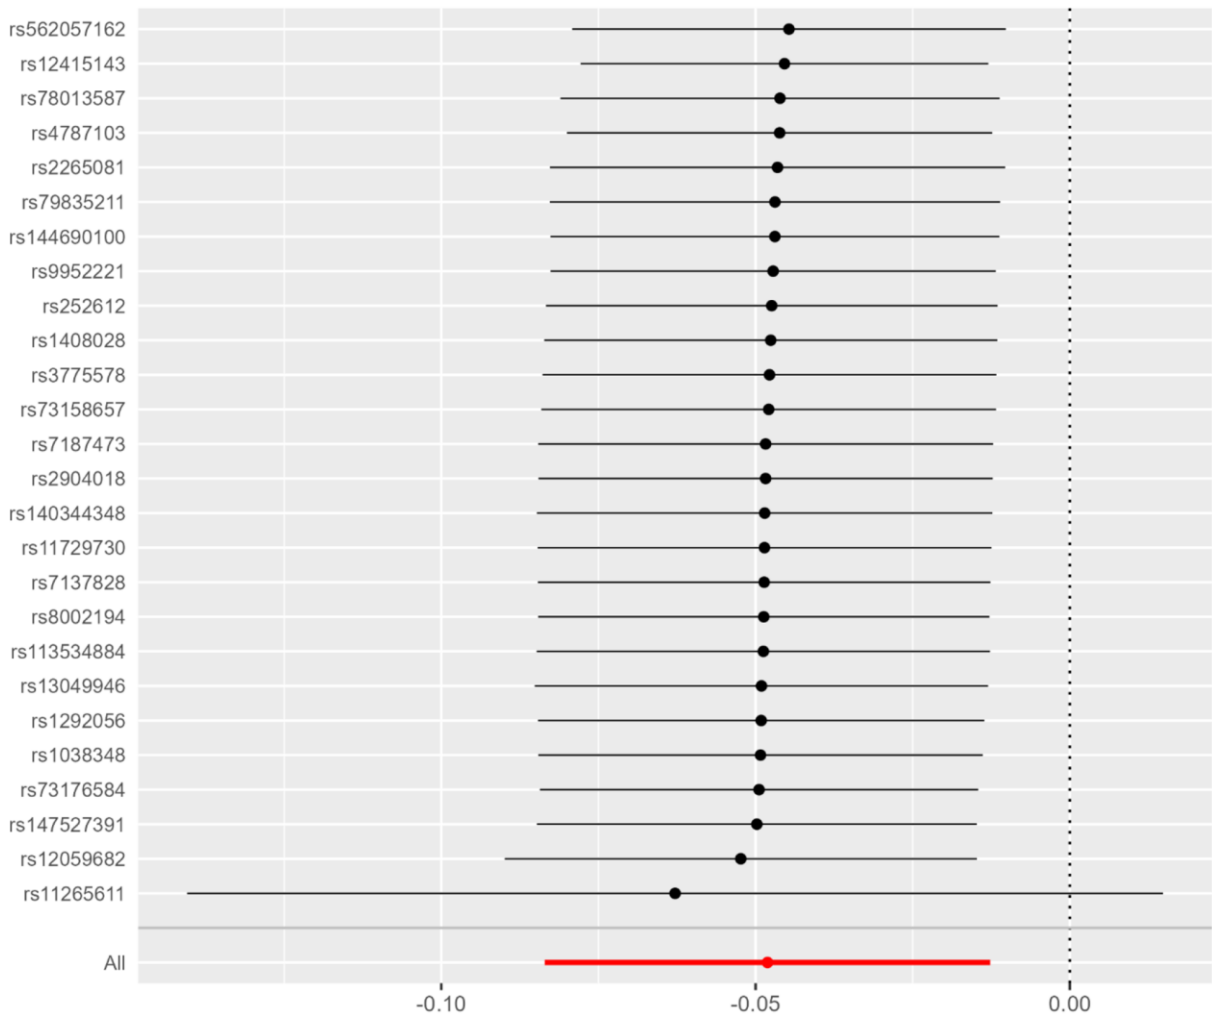

Supplementary Figure 2. Leave-one-out analysis.

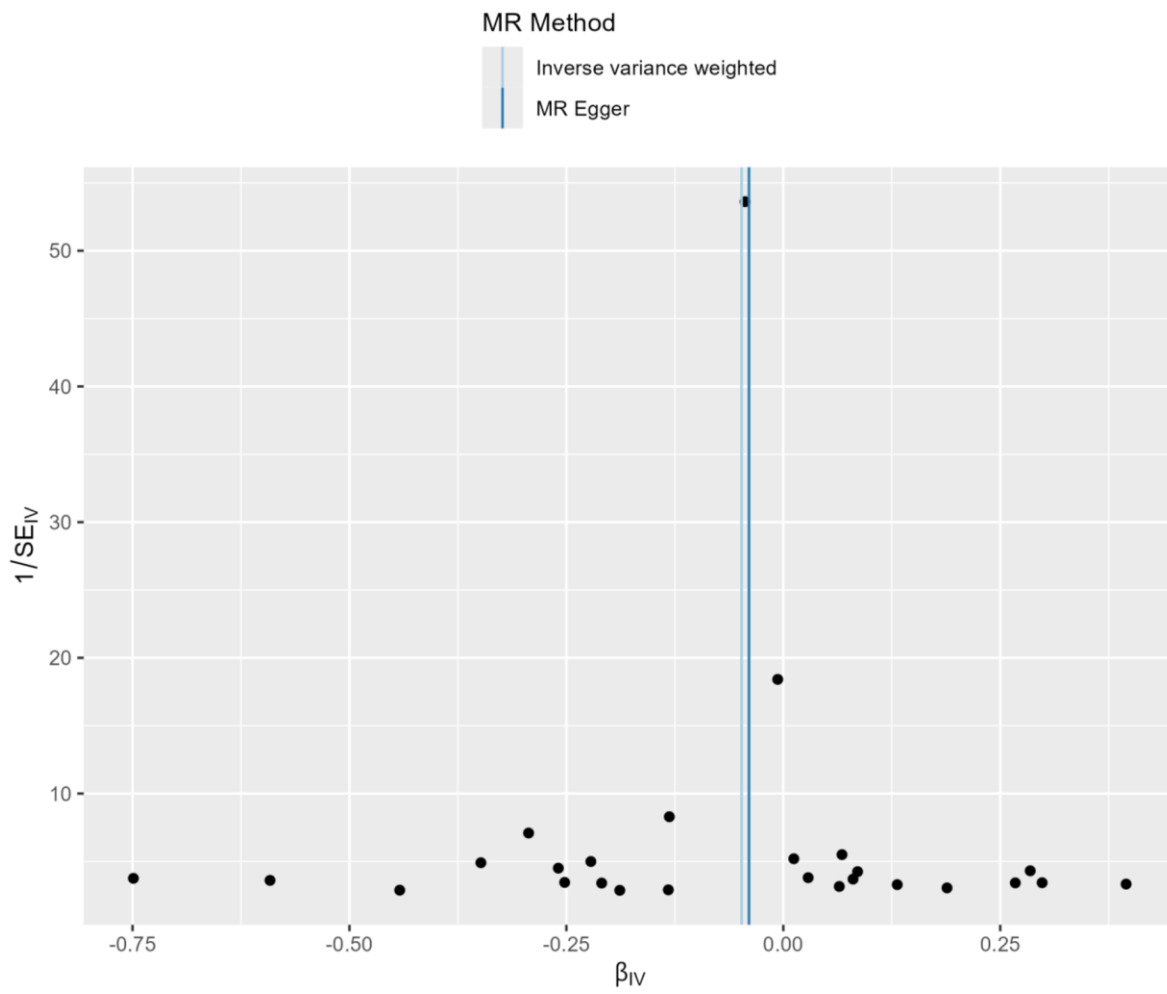

Supplementary Figure 3. Funnel plot.

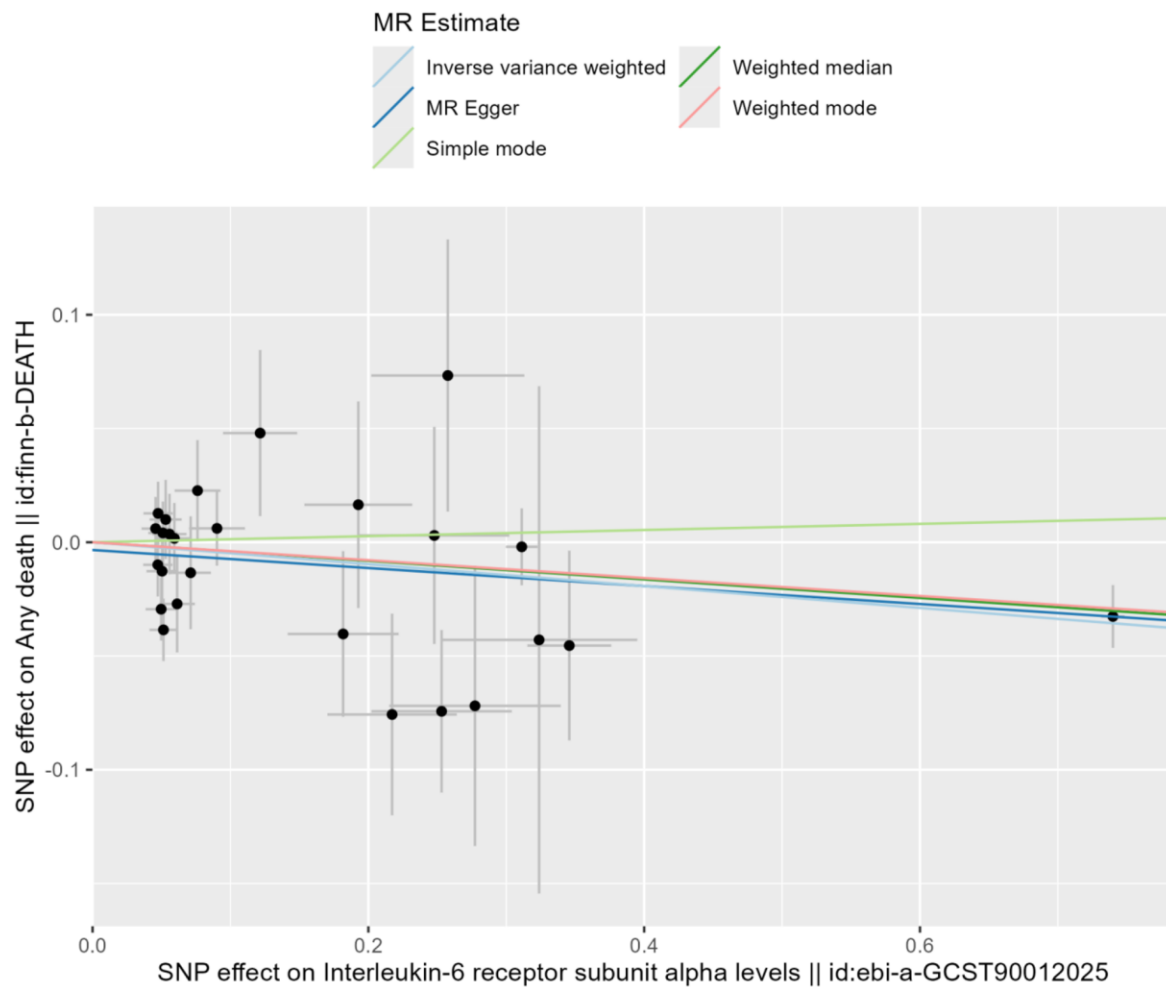

Supplementary Figure 4. Scatter plot.
